# Supplementary material
Source: publisher figshare collection journal article supplement (https://acs.figshare.com/ndownloader/files/3808036)
Supplement: Supplementary file 1 [file 3808036]

Supporting Information for:

**Electronic Structure of  $\text{Ni}_2\text{E}_2$  complexes (E = S, Se, Te) and a Global Analysis of  $\text{M}_2\text{E}_2$  Compounds: A Case for Quantized  $\text{E}_2^{n-}$  Oxidation Levels with  $n = 2, 3$ , or  $4$**

Shu A. Yao,<sup>a</sup> Vlad Martin-Diaconescu,<sup>b</sup> Ivan Infante,<sup>c</sup> Kyle M. Lancaster,<sup>d</sup> Andreas W.

Götz,<sup>e</sup> Serena DeBeer,<sup>b,d</sup> and John F. Berry<sup>a,\*</sup>

- a. Department of Chemistry, University of Wisconsin – Madison, 1101 University Ave. Madison, WI 53706, USA
- b. Max Planck Institute for Chemical Energy Conversion, Stiftstraße 34-36, D-45470, Mülheim/Ruhr, Germany
- c. Kimika Fakultatea, Euskal Herriko Unibertsitatea, and Donostia International Physics Center (DIPC), P. K. 1072, 20080 Donostia, Euskadi (Spain)
- d. Department of Chemistry and Chemical Biology, Cornell University, Ithaca, NY 14853 (USA)
- e. San Diego Supercomputer Center, University of California San Diego, La Jolla, CA 92093 (USA)

Email: [berry@chem.wisc.edu](mailto:berry@chem.wisc.edu)

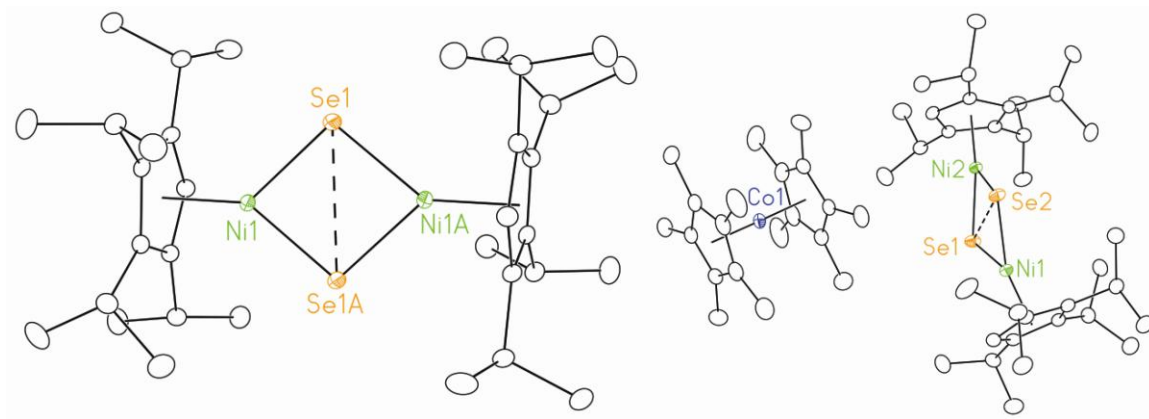

**Figure S1.** Crystal structures of **2** (Cp'NiSe)<sub>2</sub> and **2red** [Cp\*<sub>2</sub>Co]<sup>+</sup>[(Cp'NiSe)<sub>2</sub>]<sup>-</sup>.<sup>1</sup> All molecules are drawn with displacement ellipsoids at 30 % probability level and all hydrogen atoms have been omitted for clarity.

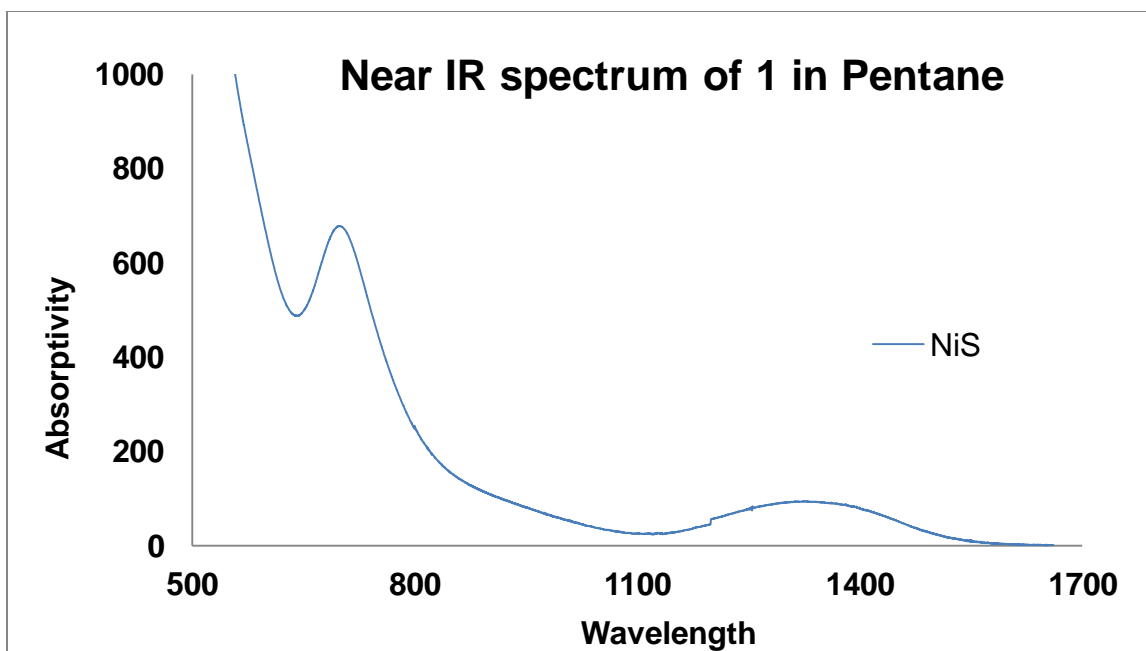

**Figure S2.** Near IR spectrum of Compound **1** in pentane solution.

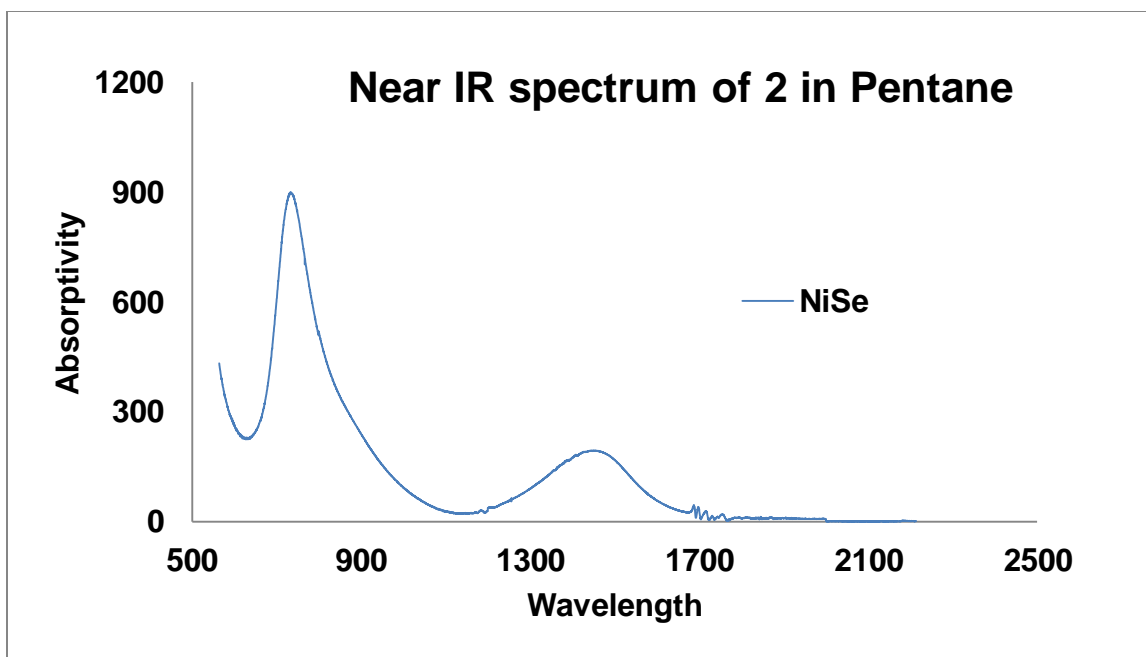

**Figure S3.** Near IR spectrum of compound **2** in pentane solution.

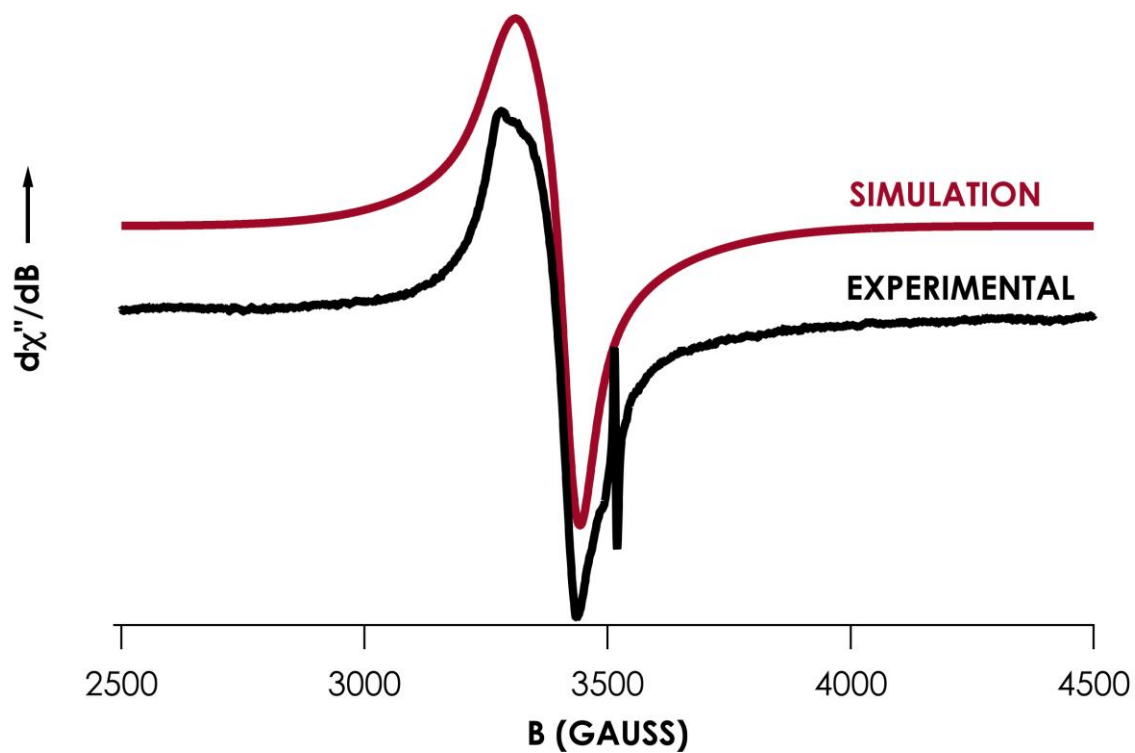

**Figure S4.** X-band EPR spectrum of solid **1red**  $[(\text{Cp}^*\text{Ni})_2\text{S}_2]^- \text{Cp}^*_2\text{Co}^+$ , experimental (black) and simulation (red). Simulated parameters:  $g_1 = 2.067$ ,  $g_2 = 2.059$ ,  $g_3 = 2.112$ ;  $g(\text{strain})_1 = 0.417$ ,  $g(\text{strain})_2 = 0.029$ ,  $g(\text{strain})_3 = 0.070$ .

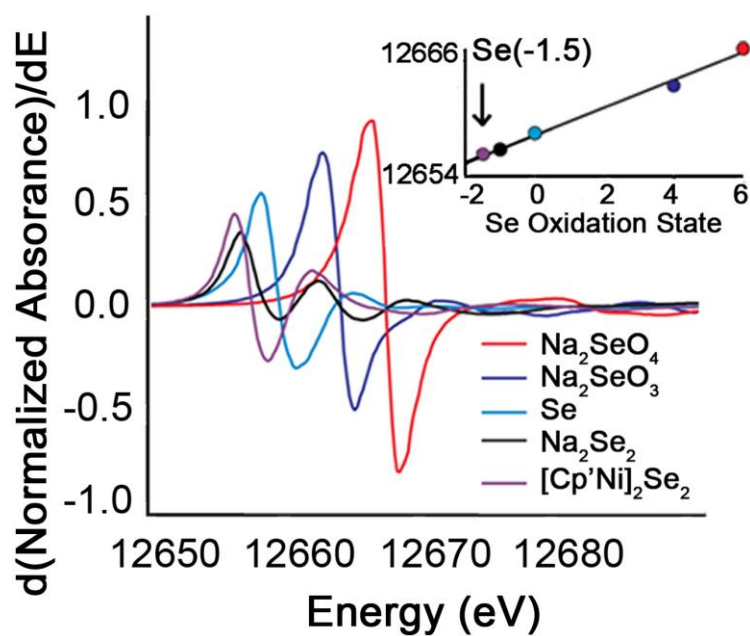

**Figure S5.** The XAS Spectroscopic analysis of **2**: The Se K-edge of **2** (purple) overlaid with spectra of  $\text{Se}^{\text{VI}}$ (red),  $\text{Se}^{\text{IV}}$  (blue),  $\text{Se}^0$ (cyan) and  $\text{Se}^{-1}$ (blank) standards; inserts the plot of oxidation stated versus the energy, this spectra has been previously communicated by Yao et al.<sup>1</sup>

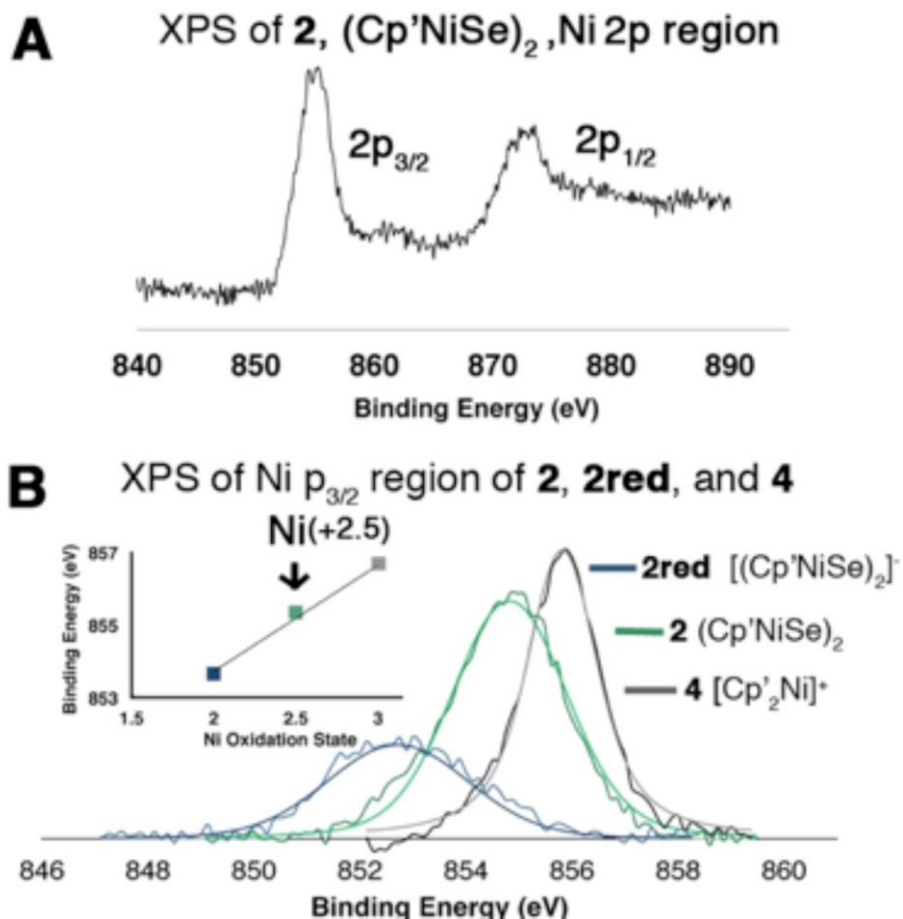

**Figure S6.** XPS analysis of **2**: A. The Ni(2p) region of the X-ray photoelectron spectrum (XPS) of **2**. B. The XPS Ni(2p<sub>3/2</sub>) region of **2** (green), **2red** (grey), and **4** (blue); insert: plot of binding energy against Ni oxidation state.

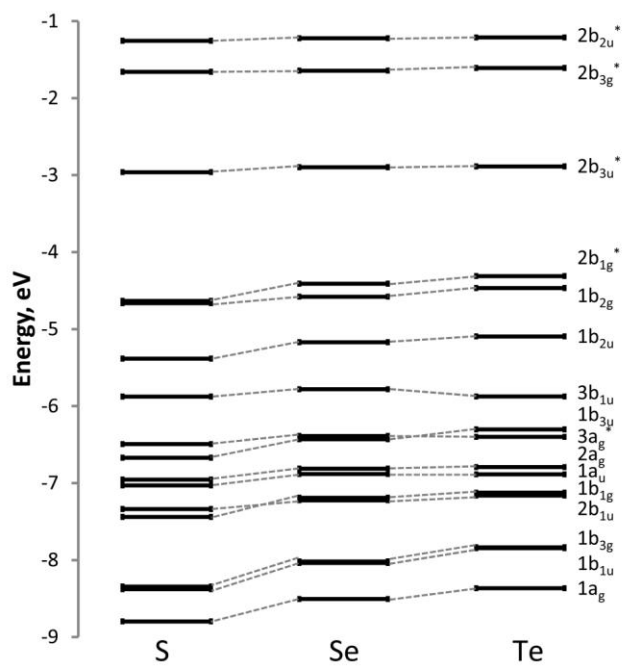

**Figure S7.** Orbital energies of the  $\text{Cp}'_2\text{Ni}_2\text{E}_2$  complexes with  $\text{E} = \text{S}, \text{Se}, \text{Te}$  derived from B3LYP calculations.

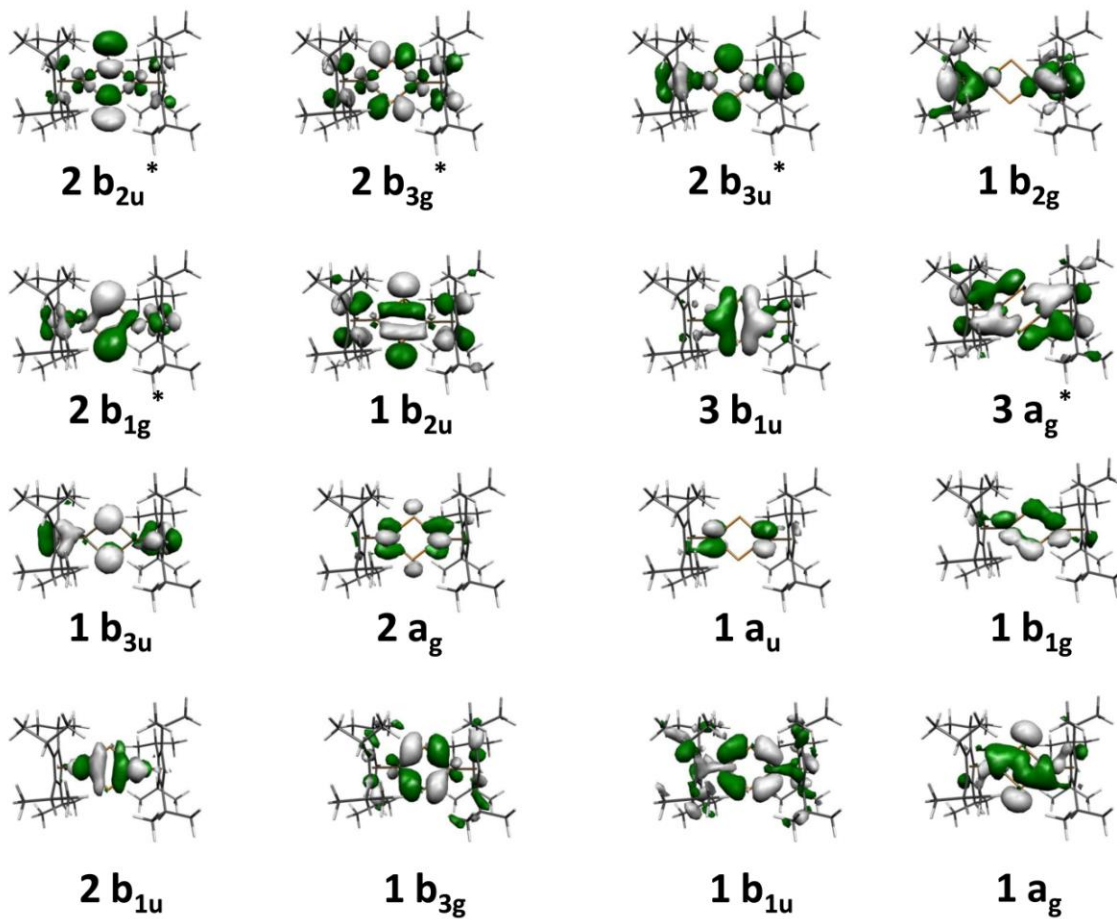

**Figure S8.** DFT (B3LYP) orbitals for  $\text{Cp}'_2\text{Ni}_2\text{S}_2$ , with no truncation of the  $\text{Cp}'$  ligand.

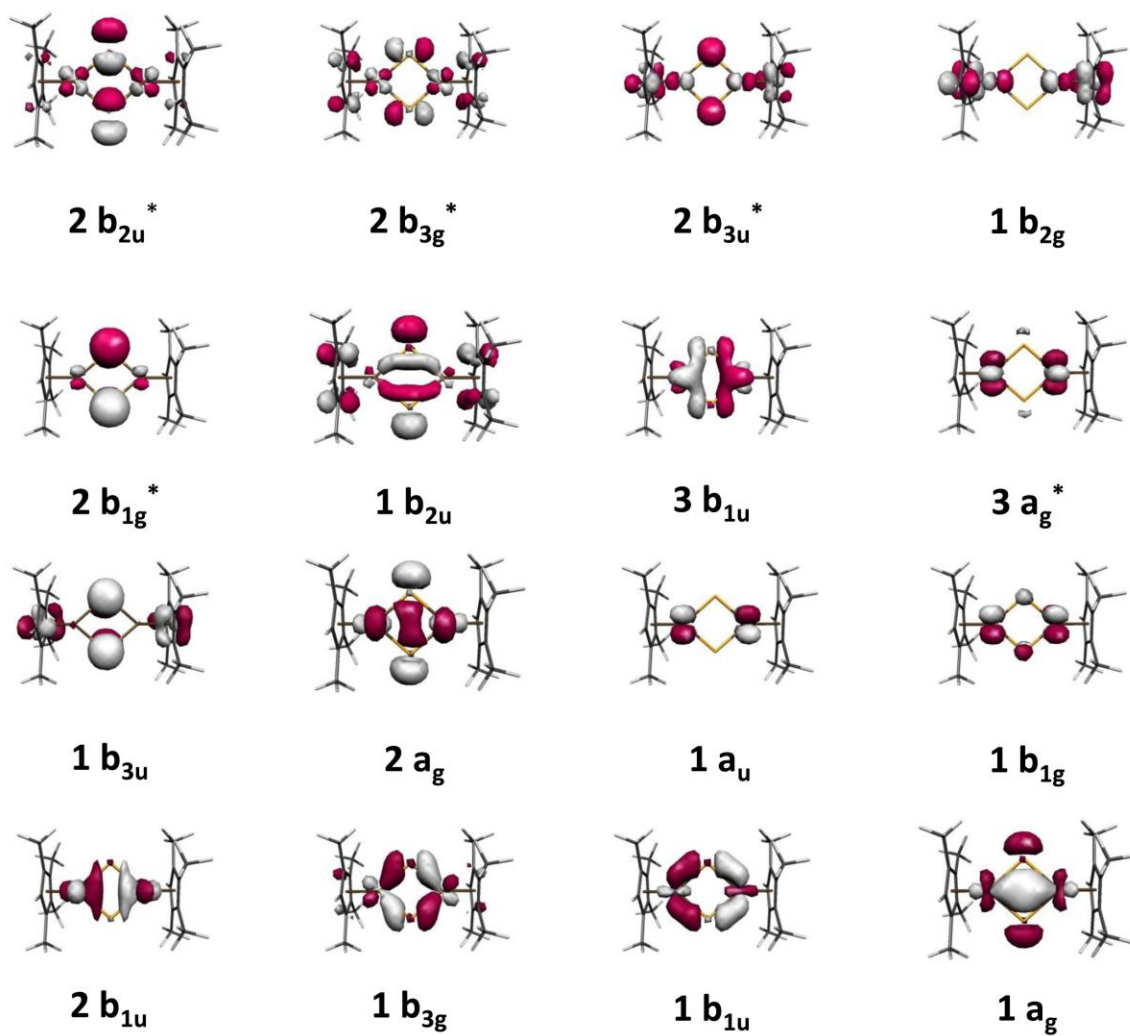

**Figure S9.** DFT (B3LYP) orbitals for  $\text{Cp}''_2\text{Ni}_2\text{Se}_2$ .

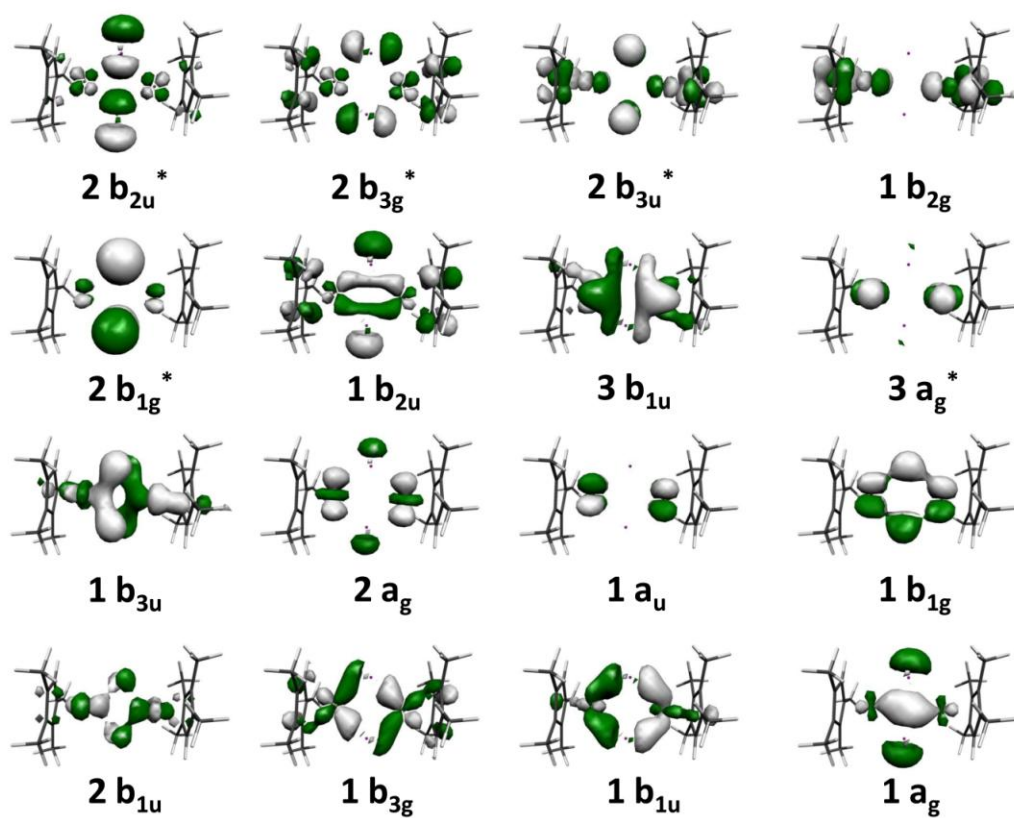

**Figure S10.** DFT (B3LYP) orbitals for  $\text{Cp}''_2\text{Ni}_2\text{Te}_2$ .

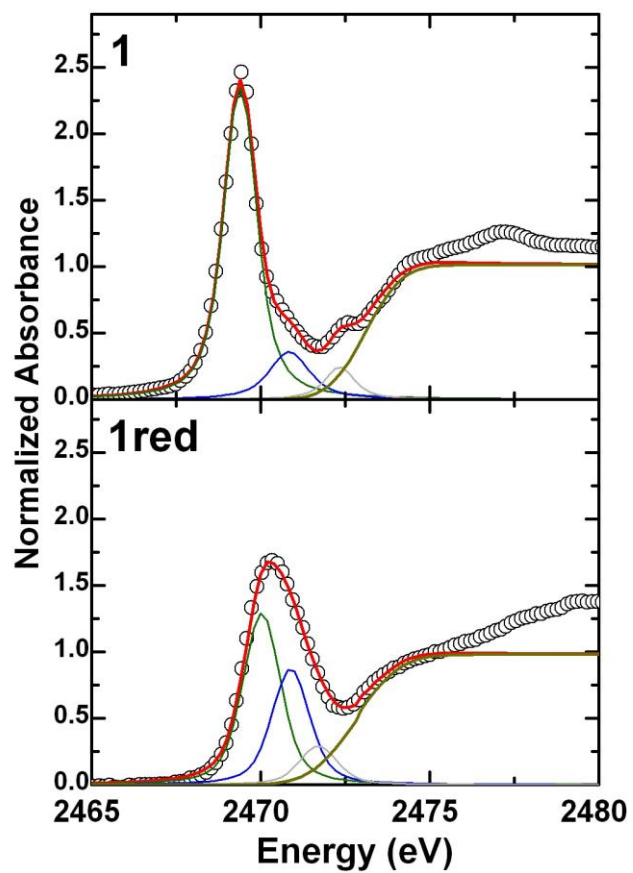

**Figure S11.** S K-edge fits of **1** and **1red** to determine edge energies. Color scheme: data (circles), total fit (red), edge jump (yellow).

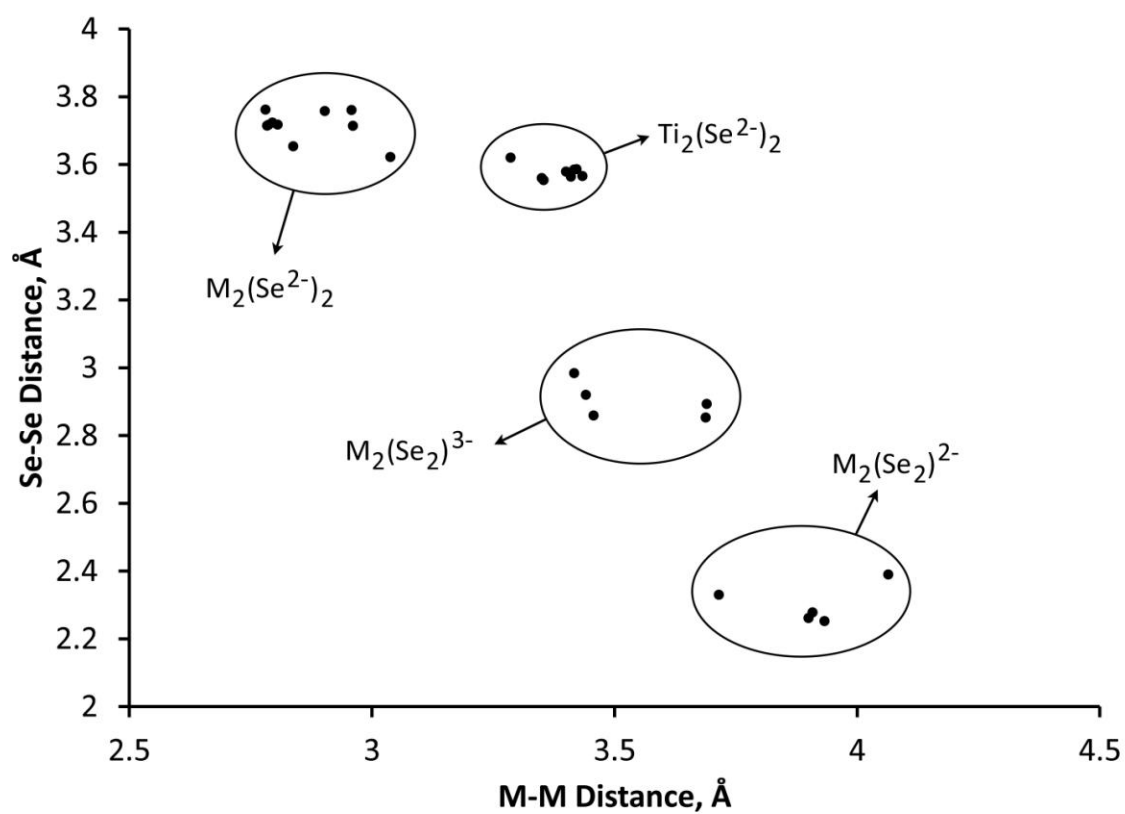

**Figure S12.** Plot of M–M vs Se–Se distance for all  $M_2Se_2$  compounds from the CCDC that contain first-row transition metals with no metal-metal bonds and no bridging ligands other than the Se atoms.

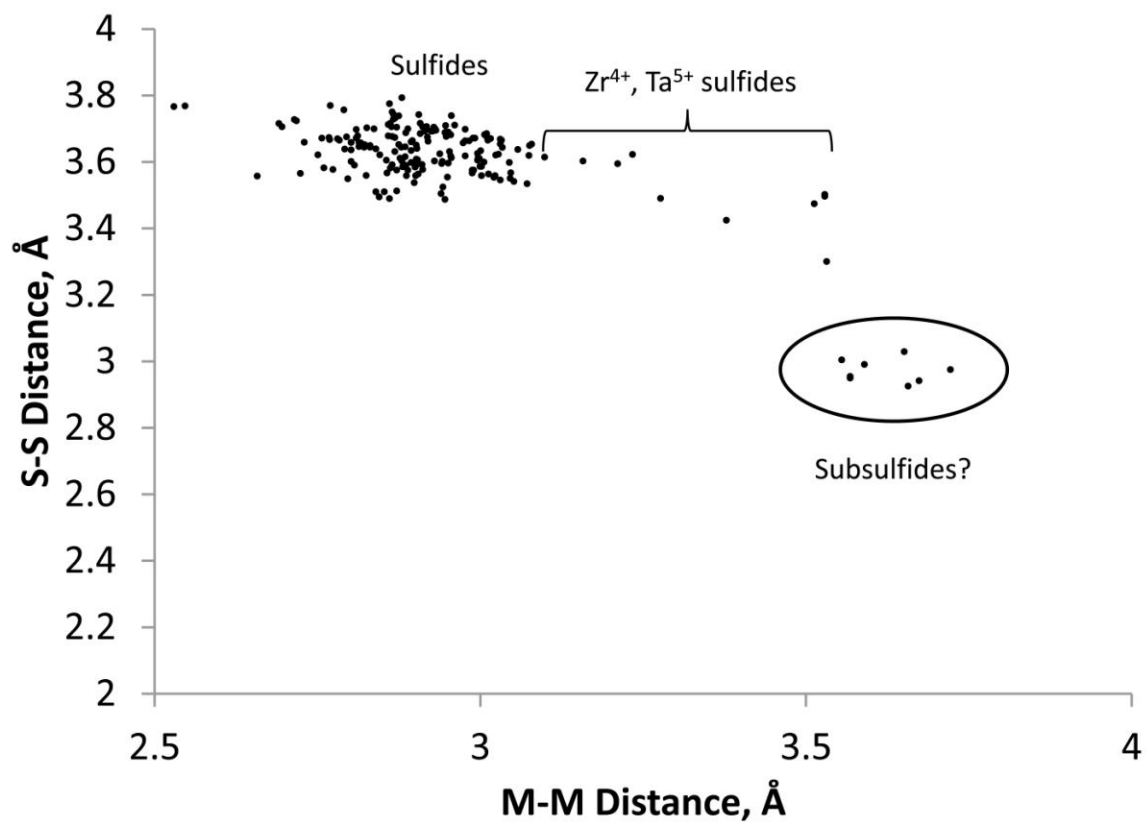

**Figure S13.** Plot of data from the Cambridge Structural Database for all compounds with a planar  $M_2S_2$  core having second and third row M atoms. The plot excludes compounds with bridging ligands other than the S atoms.

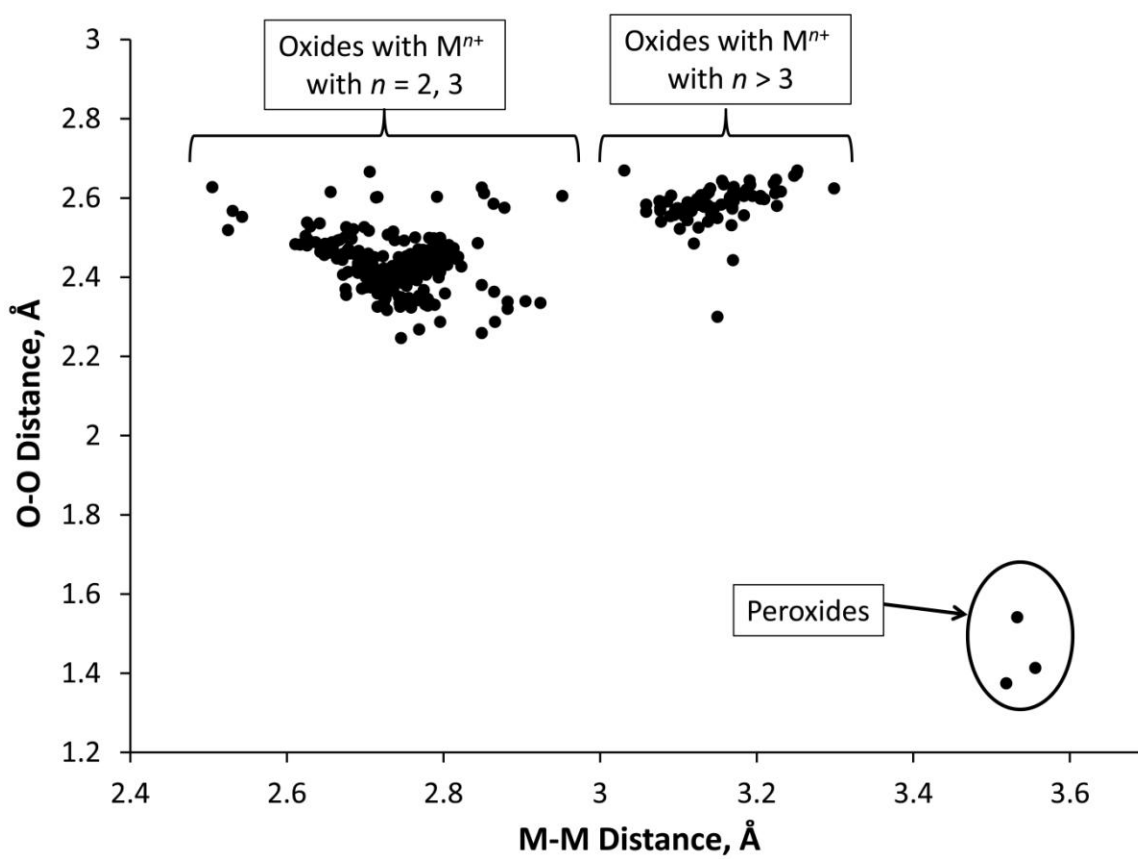

**Figure S14.** Plot of M–M vs O–O distance for all  $M_2O_2$  compounds from the CCDC that contain first-row transition metals with no bridging ligands besides the O atoms.

## References.

- (1) Yao, S. A.; Lancaster, K. M.; Gotz, A. W.; DeBeer, S.; Berry, J. F. *Chem. Eur. J.* **2012**, *18*, 9179.
